# Supplementary material
Source: Springer Nature journal article supplement (https://www.springermedizin.de/resource/supplementary/12931_2011_1155_MOESM5_ESM.pdf/9425448)

(A)

sham

BLM

(B)

BLM

WT

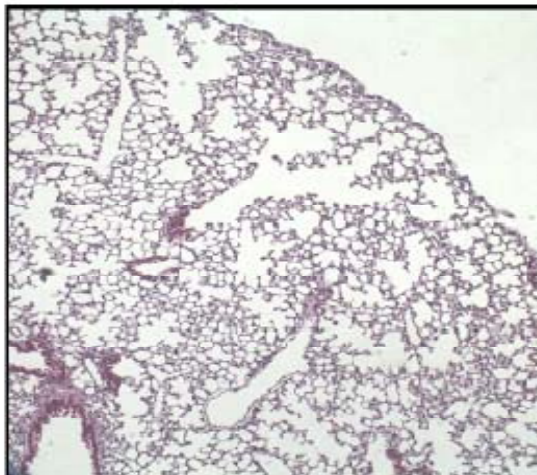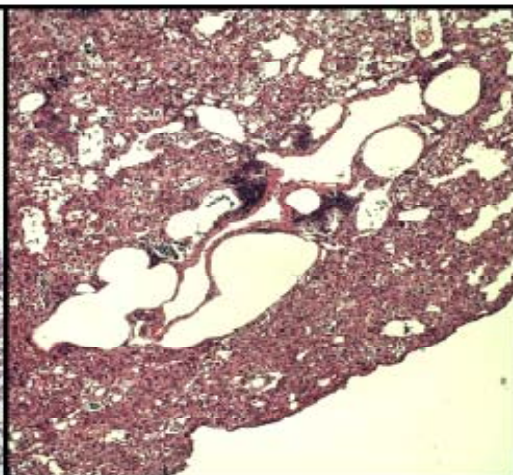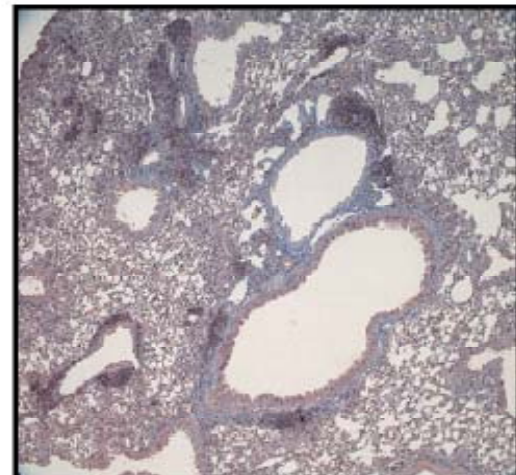

CD69<sup>-/-</sup>

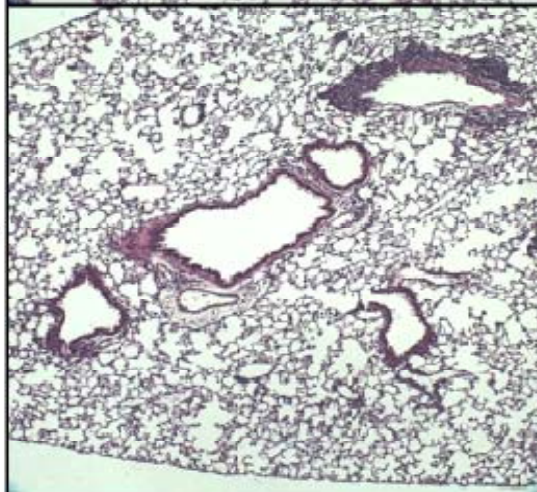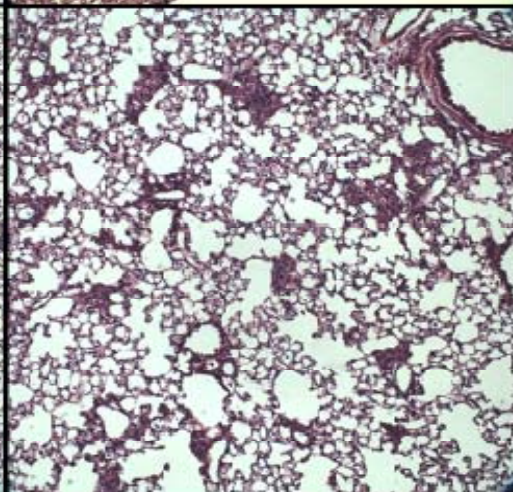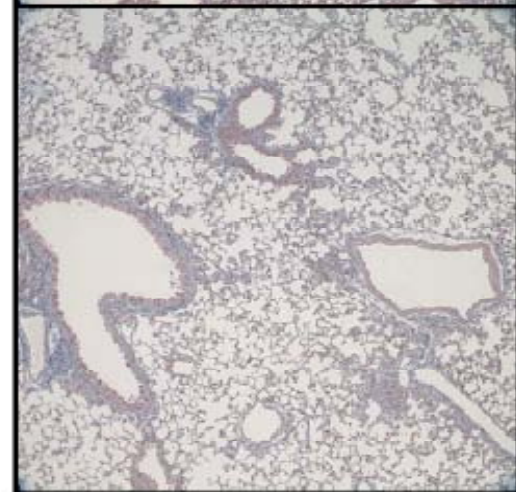

Supplement: MOESM5 [file 9425448]
